# Supplementary material for: Characterization of the herb-derived components in rats following oral administration of Carthamus tinctorius extract by extracting diagnostic fragment ions (DFIs) in the MSn chromatograms
Source: Royal Society of Chemistry journal article supplement (doi:10.1039/c4an01707b), 2014-01-01
Supplement: c4an01707b1.pdf [file c4an01707b1.pdf]

## Supplemental information B

### Characterization of the herb-derived components in rats following oral administration of *Carthamus tinctorius* extract by extracting diagnostic fragment ions (DFIs) in the MS<sup>n</sup> chromatograms

Jin-Feng Chen,<sup>a#</sup> Yue-Lin Song,<sup>b#</sup> Xiao-Yu Guo,<sup>a</sup> Peng-Fei Tu<sup>ab</sup> and Yong Jiang<sup>\*a</sup>

<sup>a</sup> *State Key Laboratory of Natural and Biomimetic Drugs, School of Pharmaceutical Sciences, Peking University, Beijing 100191, China. E-mail: yongjiang@bjmu.edu.cn; Tel/Fax: +86-10-82802719*

<sup>b</sup> *Modern Research Center for Traditional Chinese Medicine, Beijing University of Chinese Medicine, Beijing 100029, China*

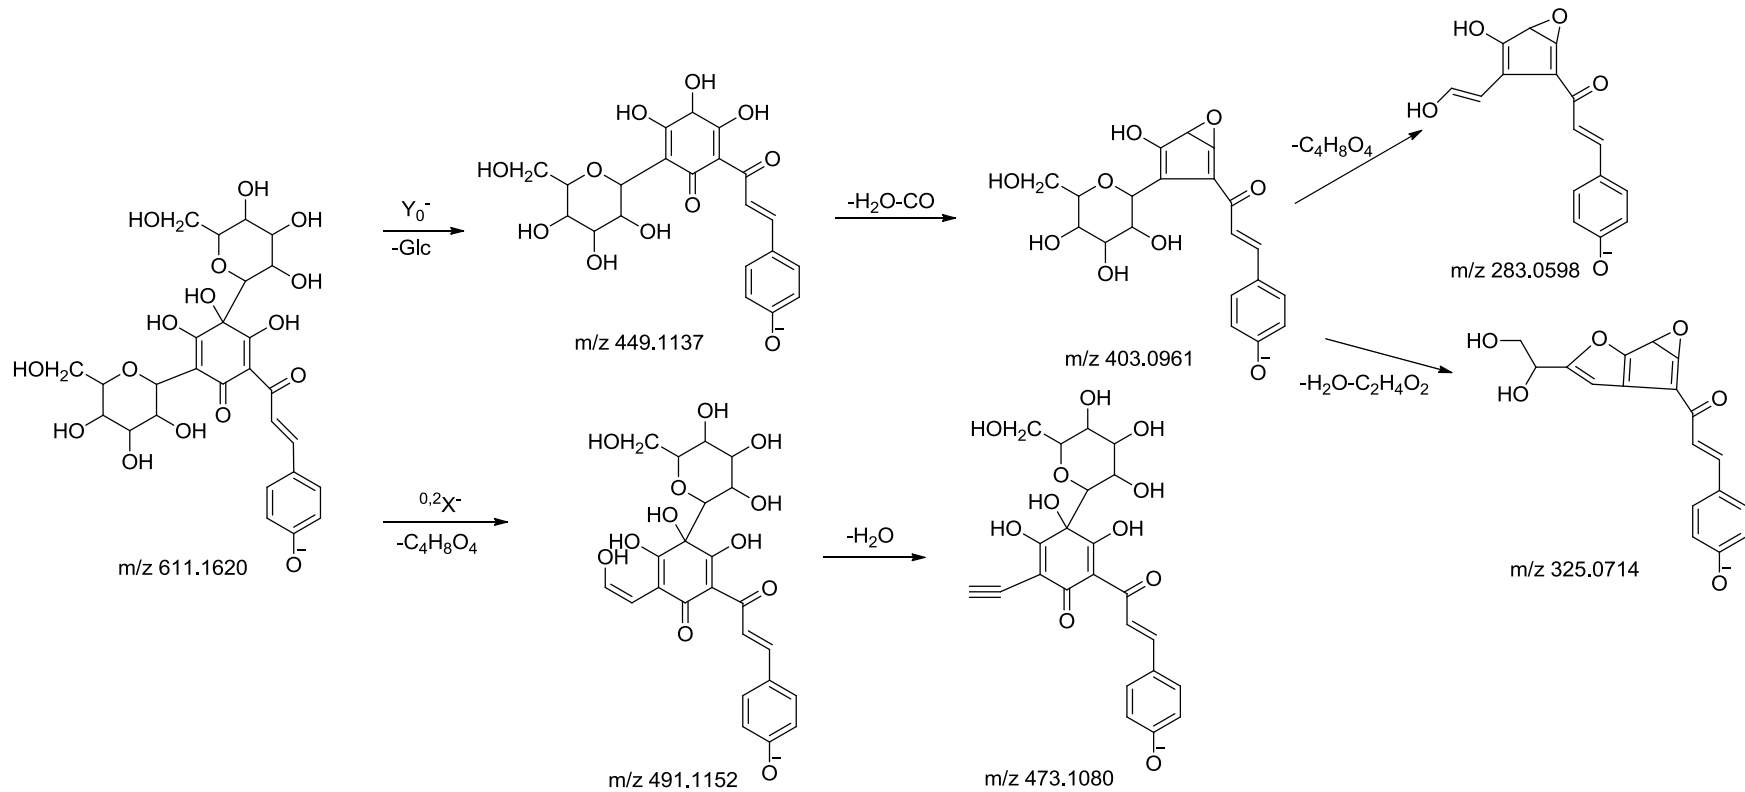

**Fig. S1A** The characteristic fragmentation pathways of HSYA.

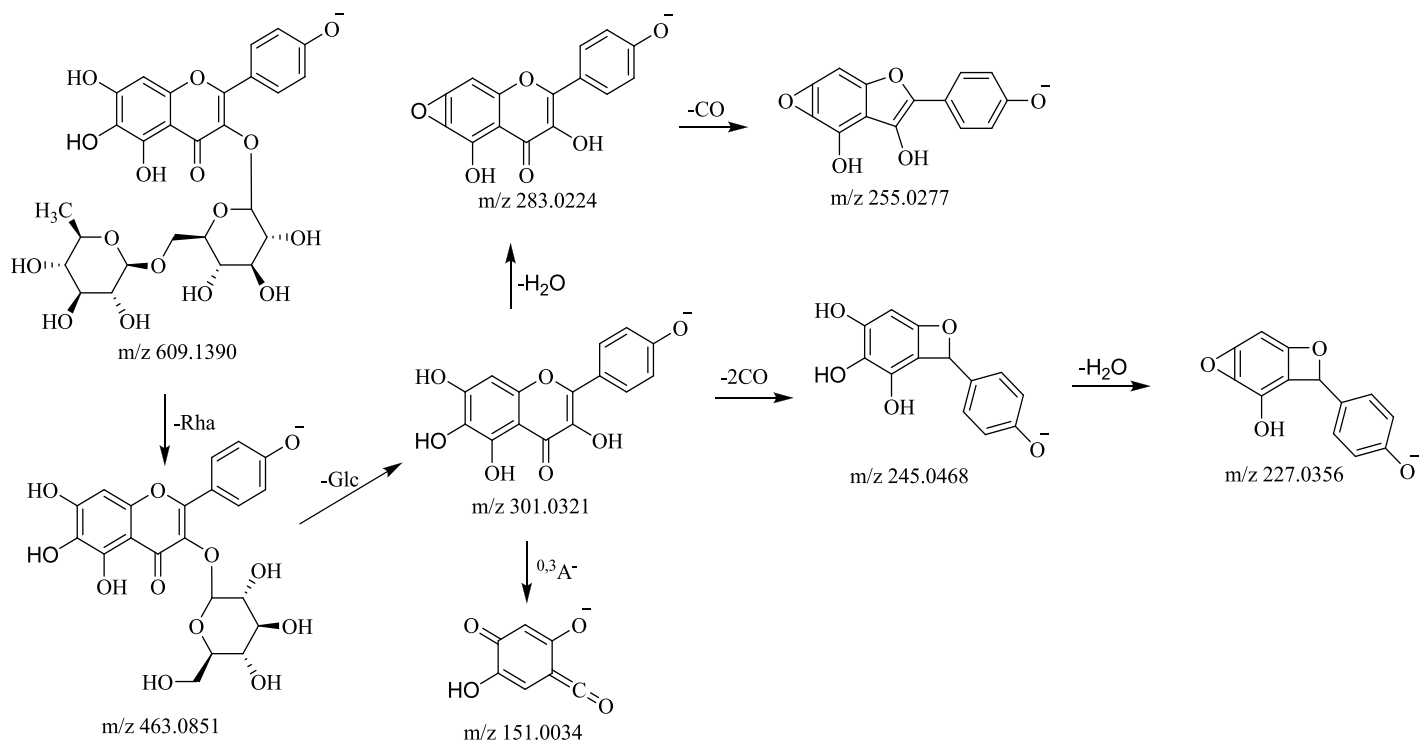

**Fig. S1B** The characteristic fragmentation pathways of 6-Hydroxykaempferol-3-*O*-rutinoside.

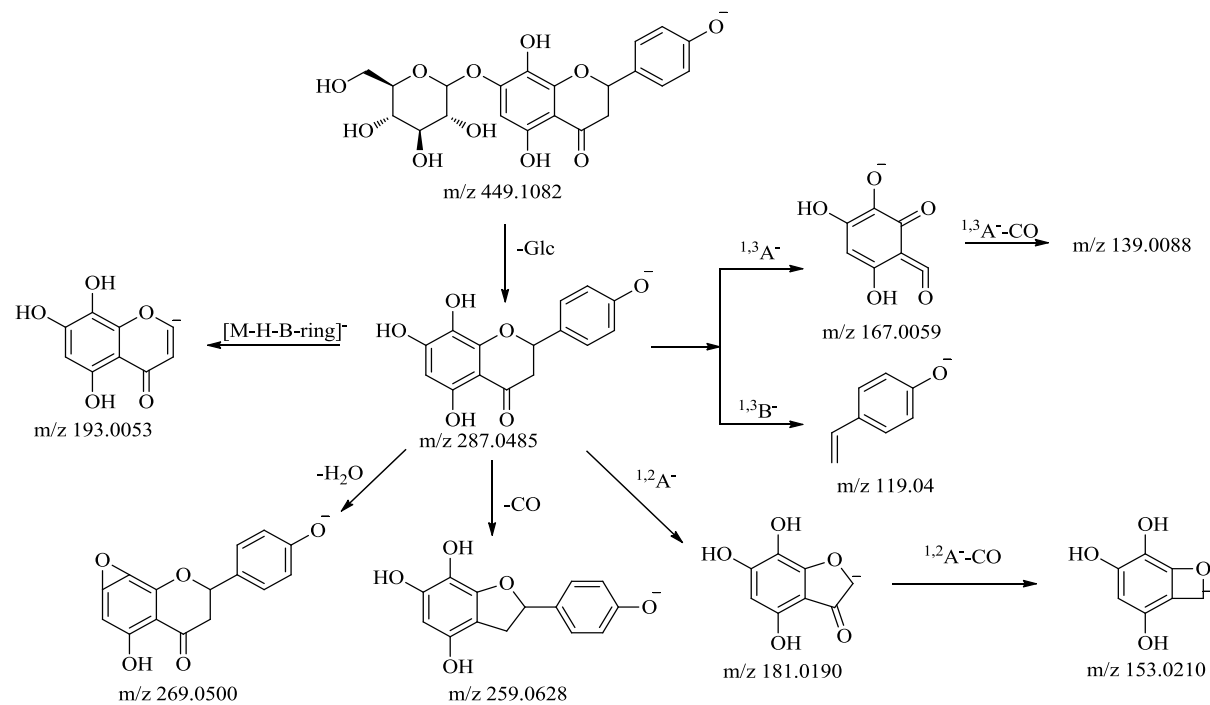

**Fig. S1C** The characteristic fragmentation pathways of Cathamidin-7-O-glucoside.



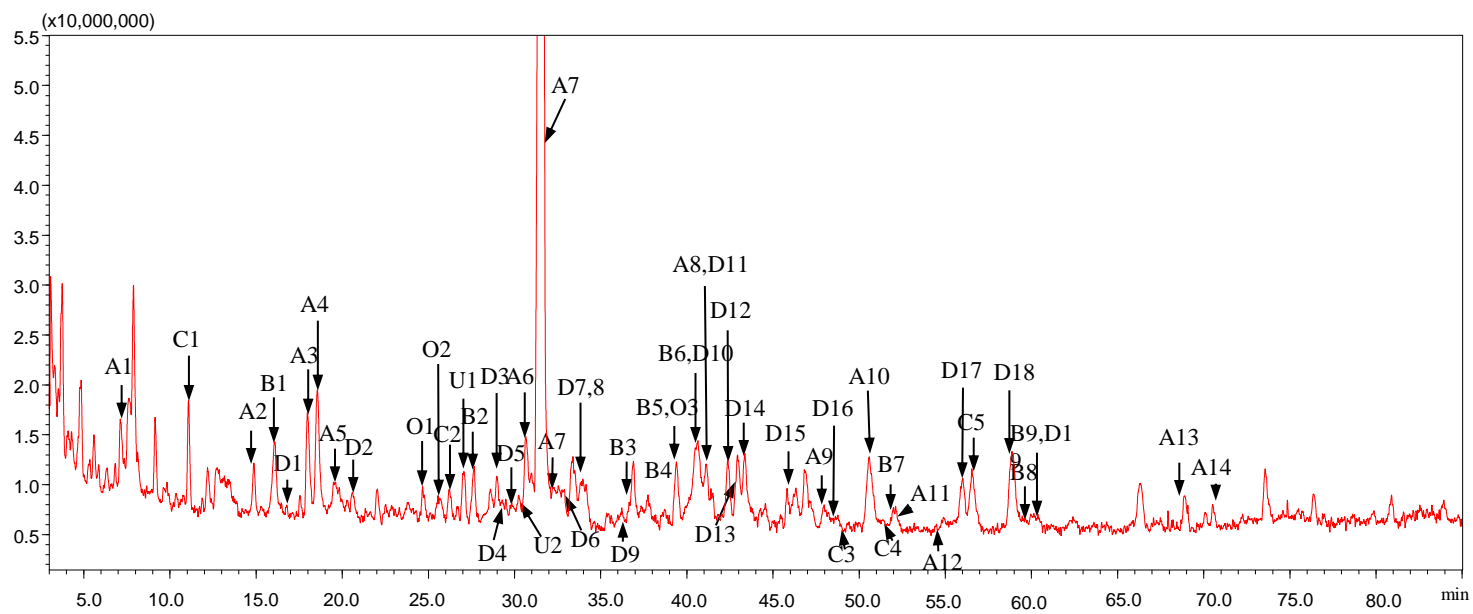

**Fig. S2** The total ion current chromatogram (TIC) of ECT.

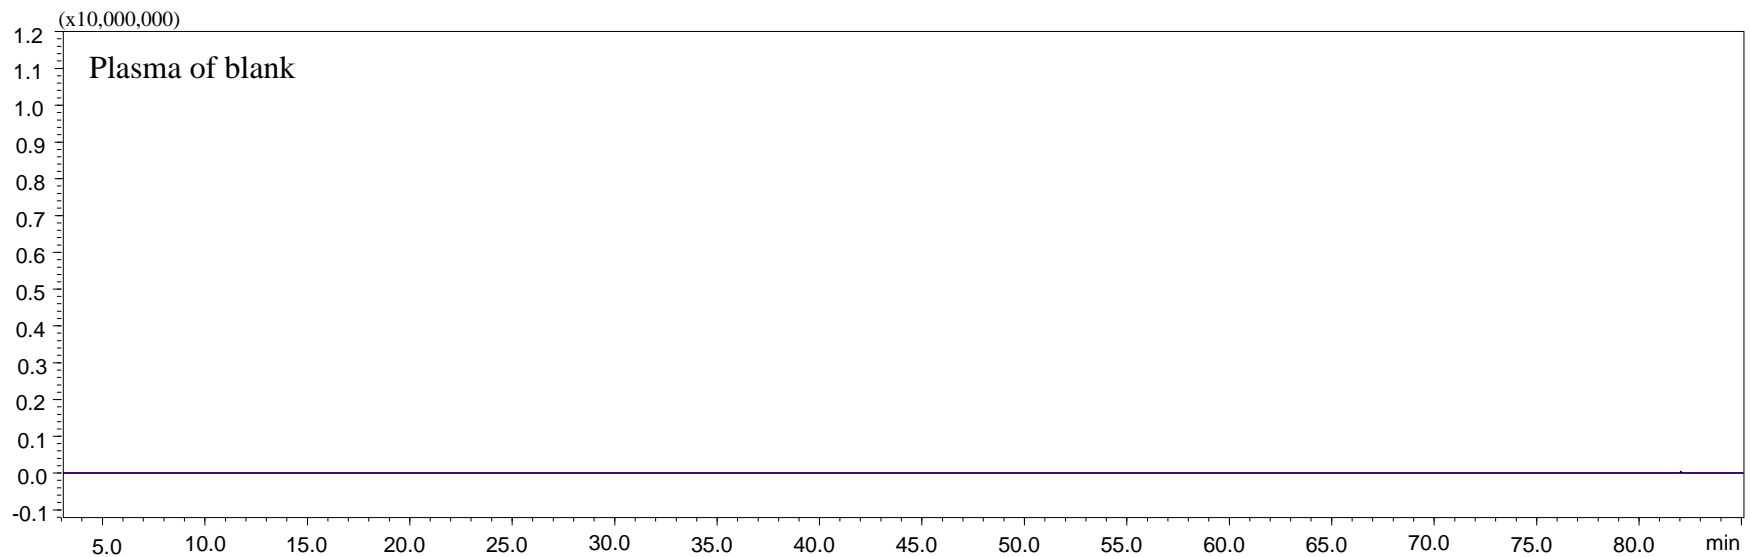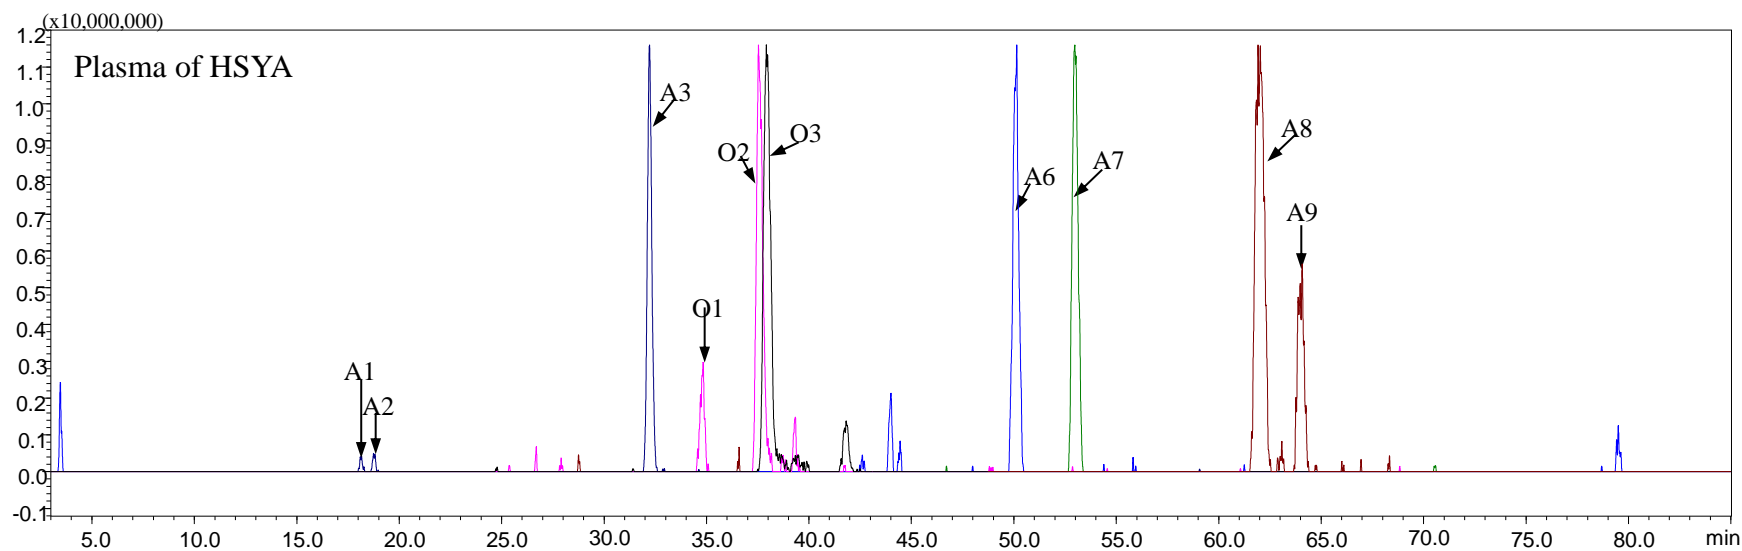

**Fig. S3** The extracted ion chromatograms of blank samples and biological samples in rats after oral administration of HSYA.

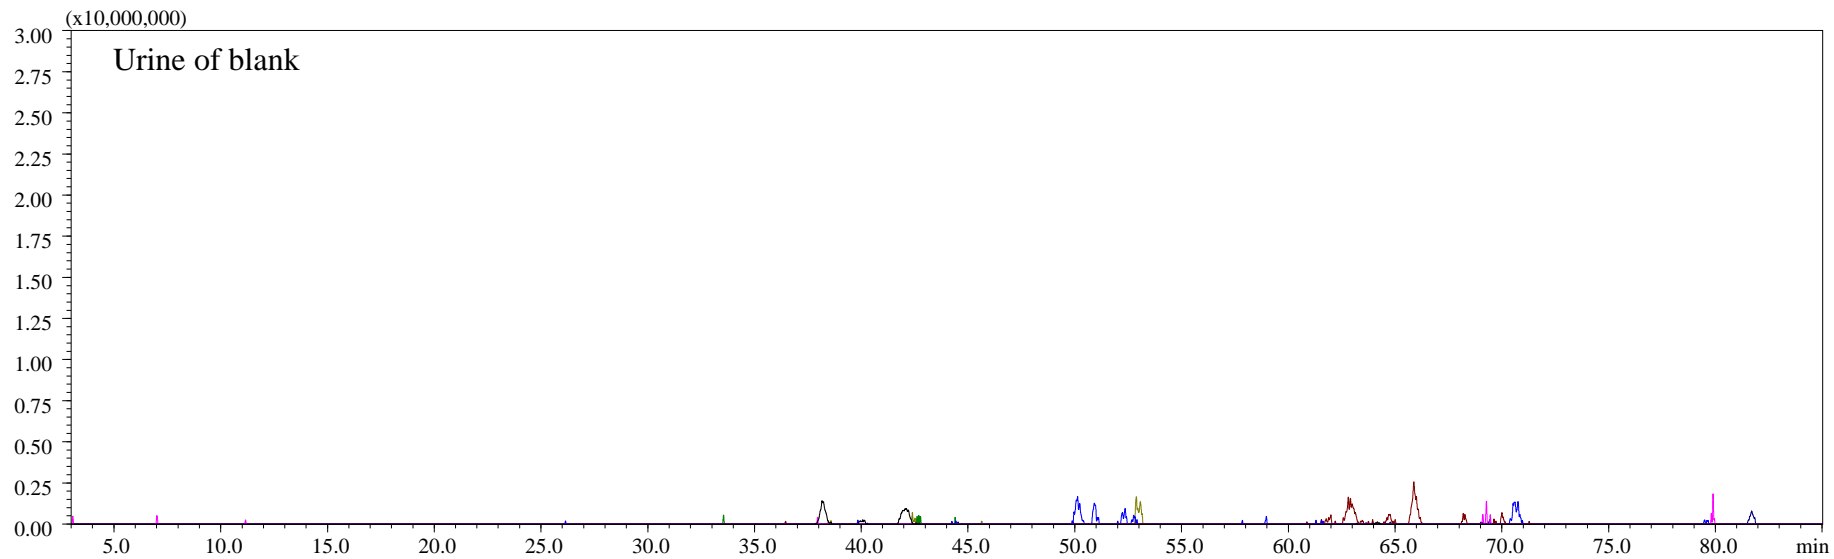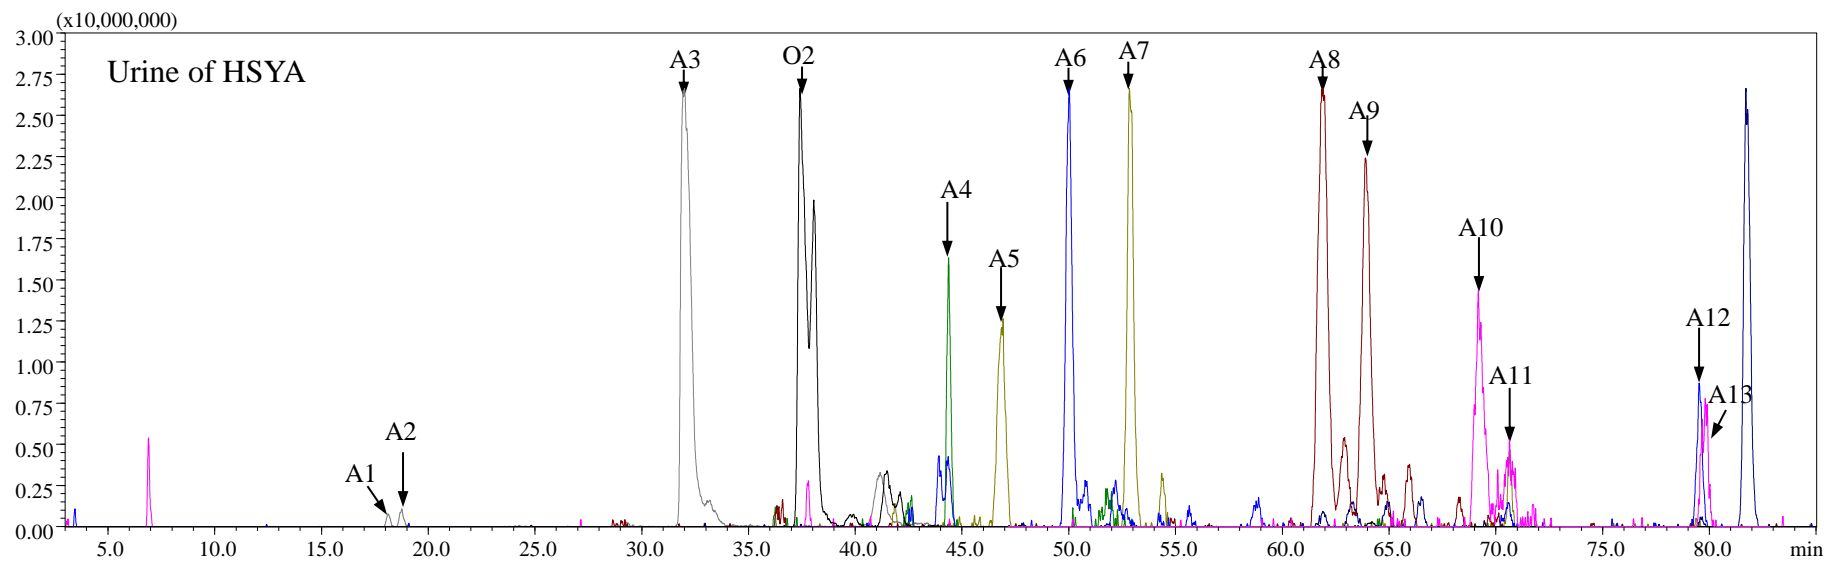

**Fig. S3 (continued)**

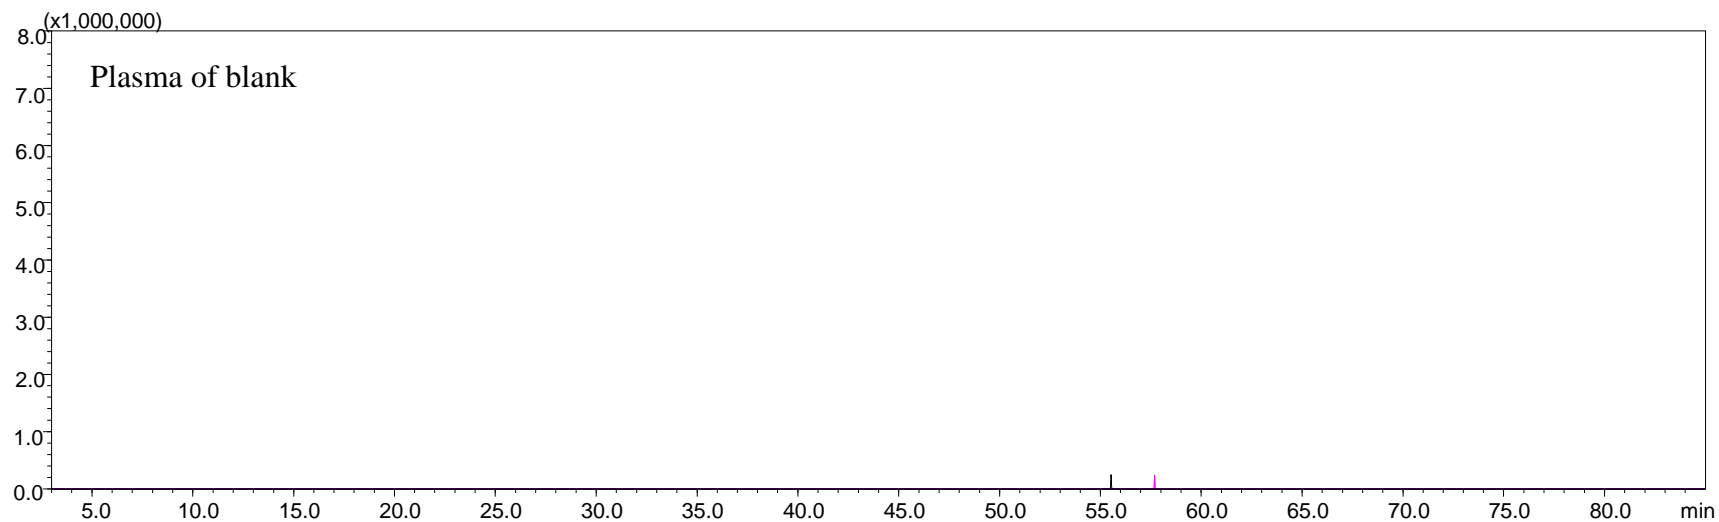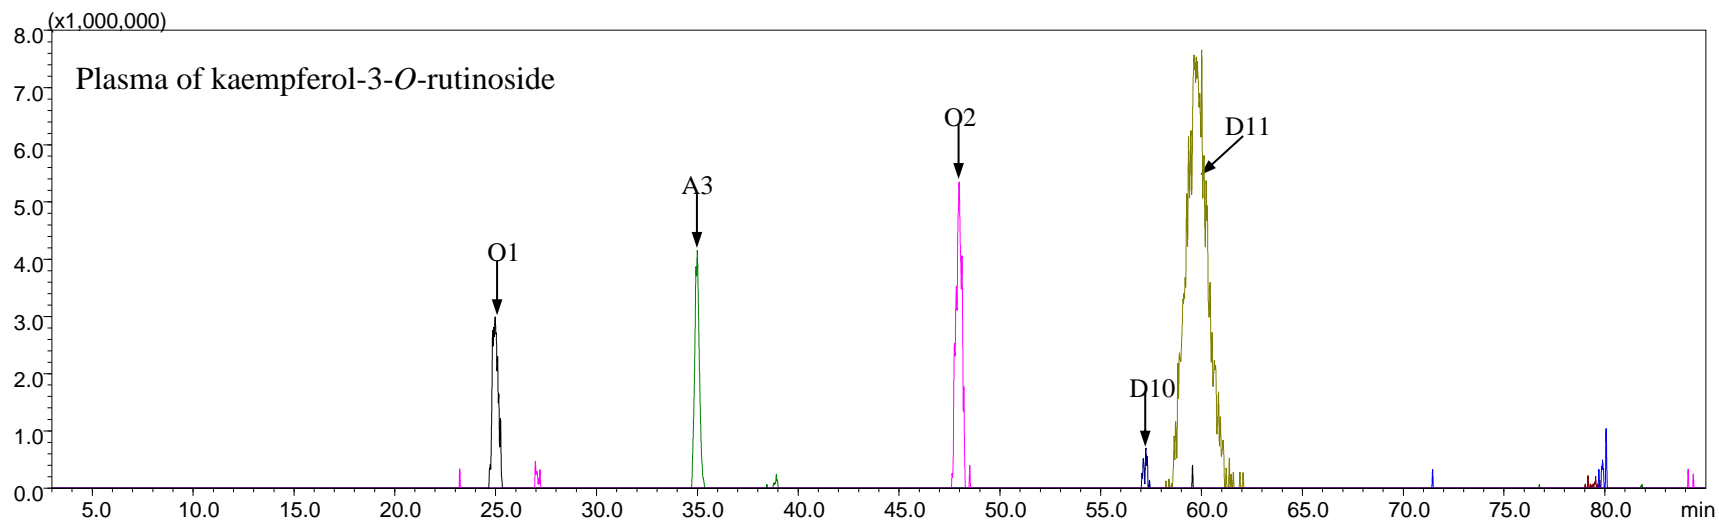

**Fig. S4** The extracted ion chromatograms of blank samples and biological samples in rats after oral administration of kaempferol-3-*O*-rutinoside.

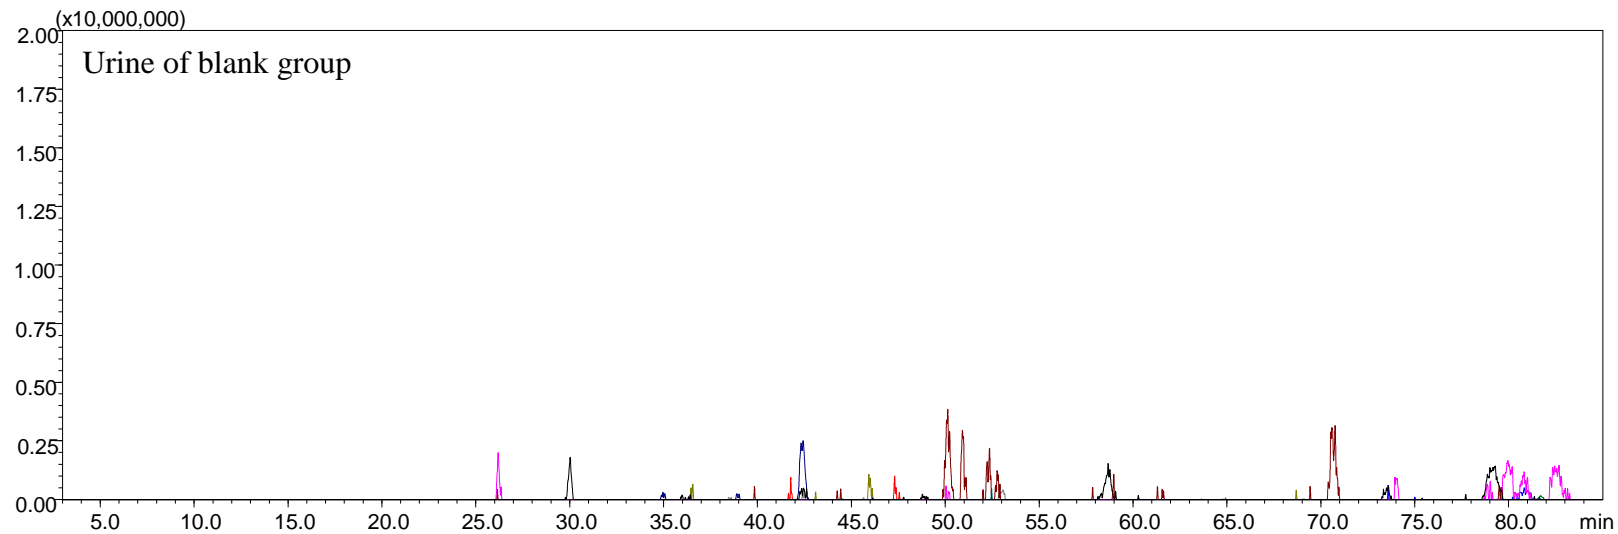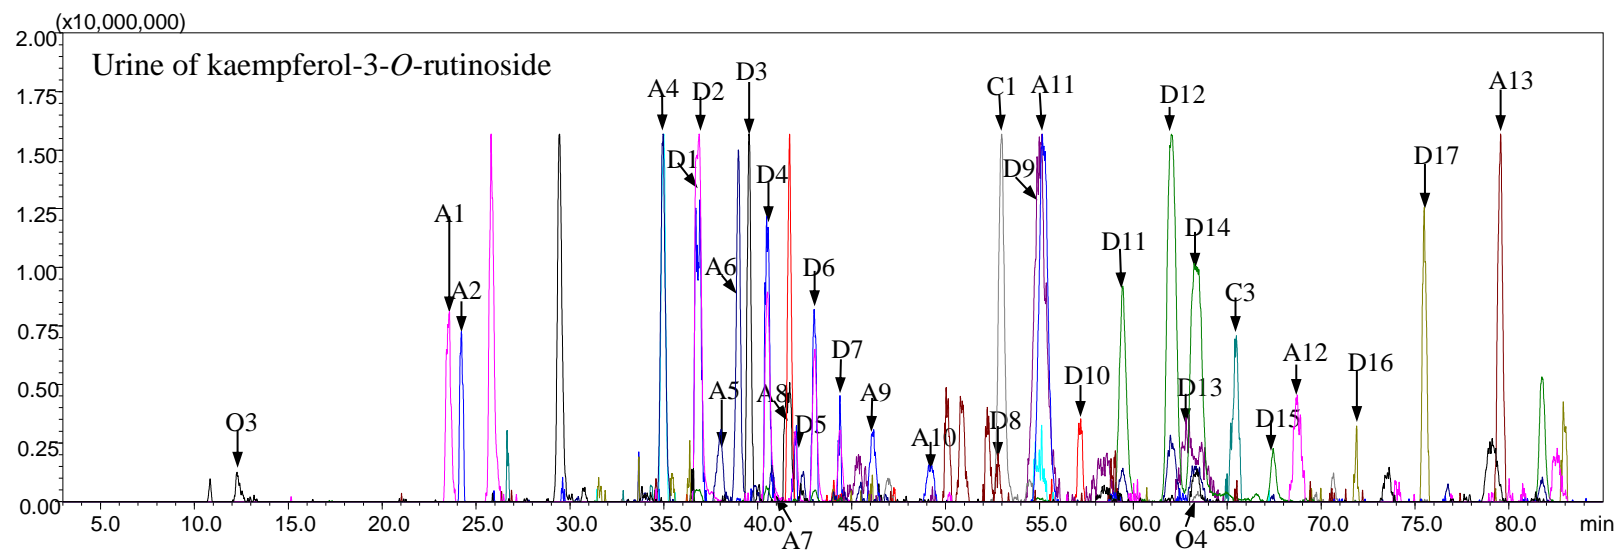

**Fig. S4** (continued)

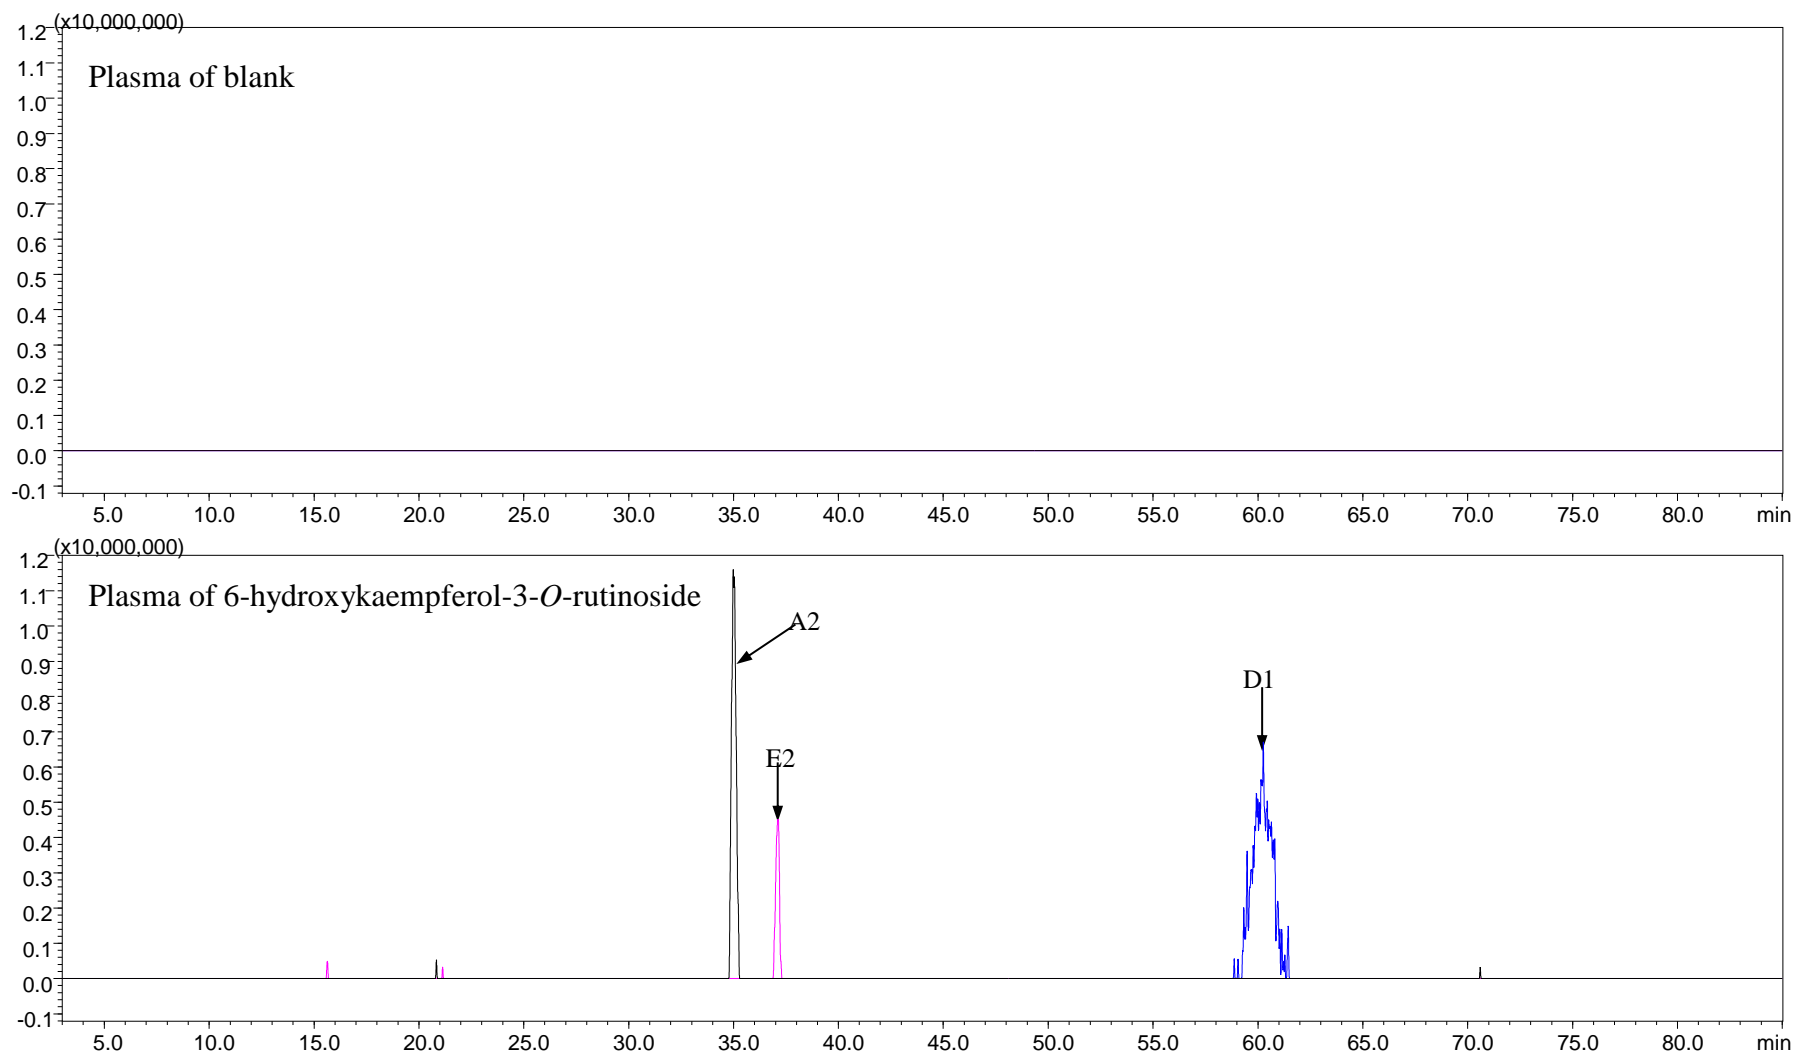

**Fig. S5** The extracted ion chromatograms of blank samples and biological samples in rats after oral administration of 6-hydroxykaempferol-3-*O*-rutinoside.

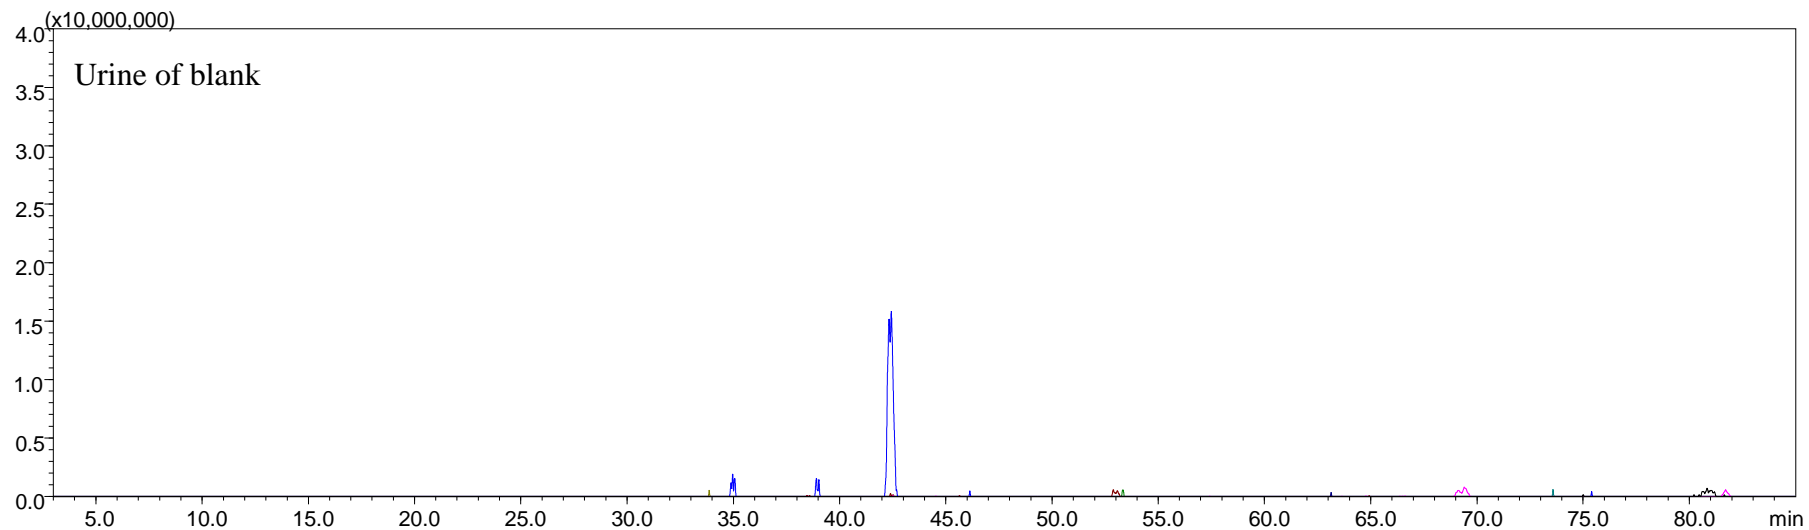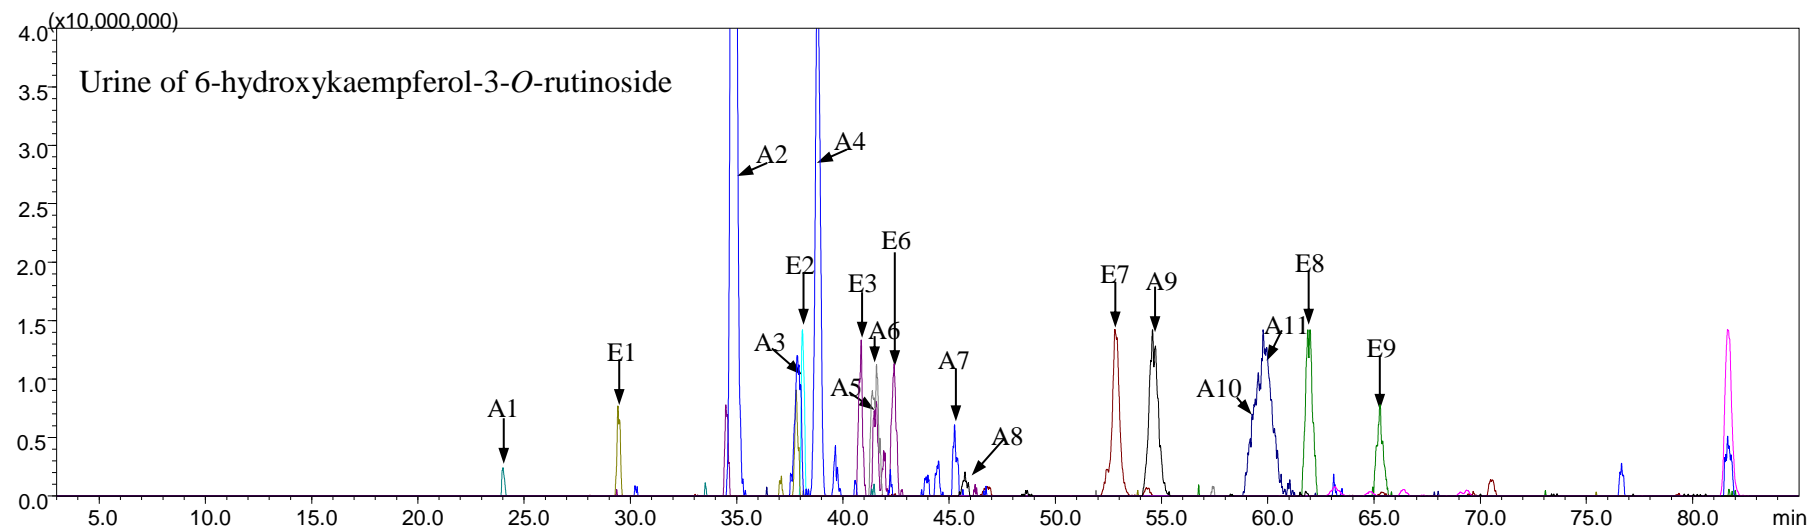

**Fig. S5 (continued)**

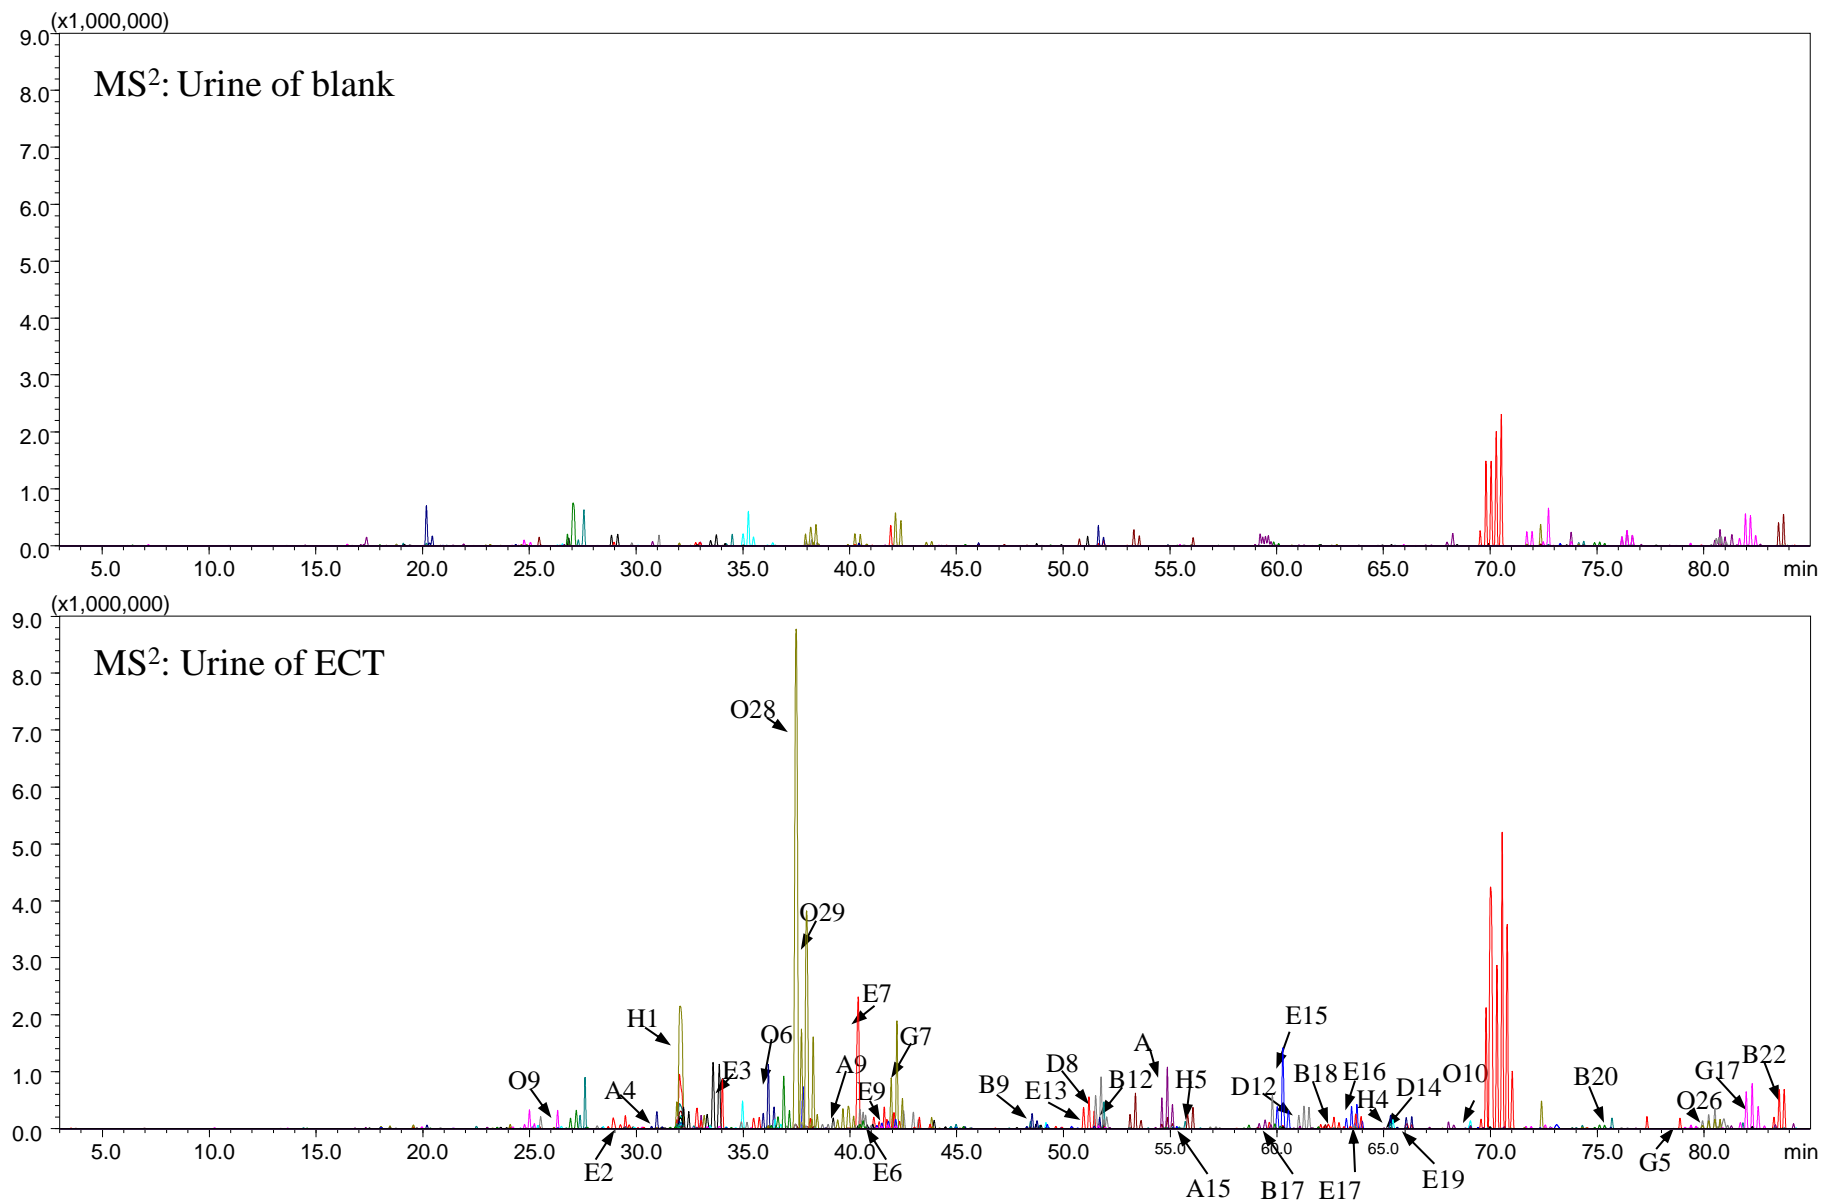

**Fig. S6** The MS<sup>n</sup> E(DFI)Cs of blank samples and biological samples in rats after oral administration of ECT.



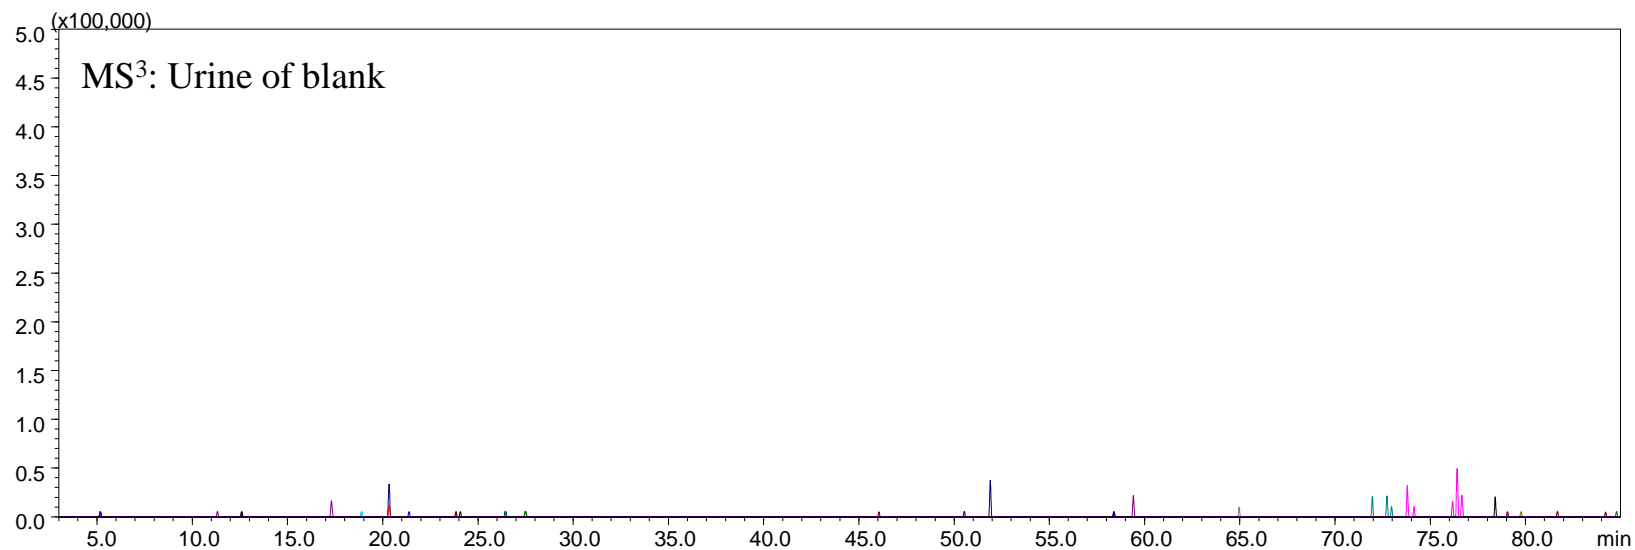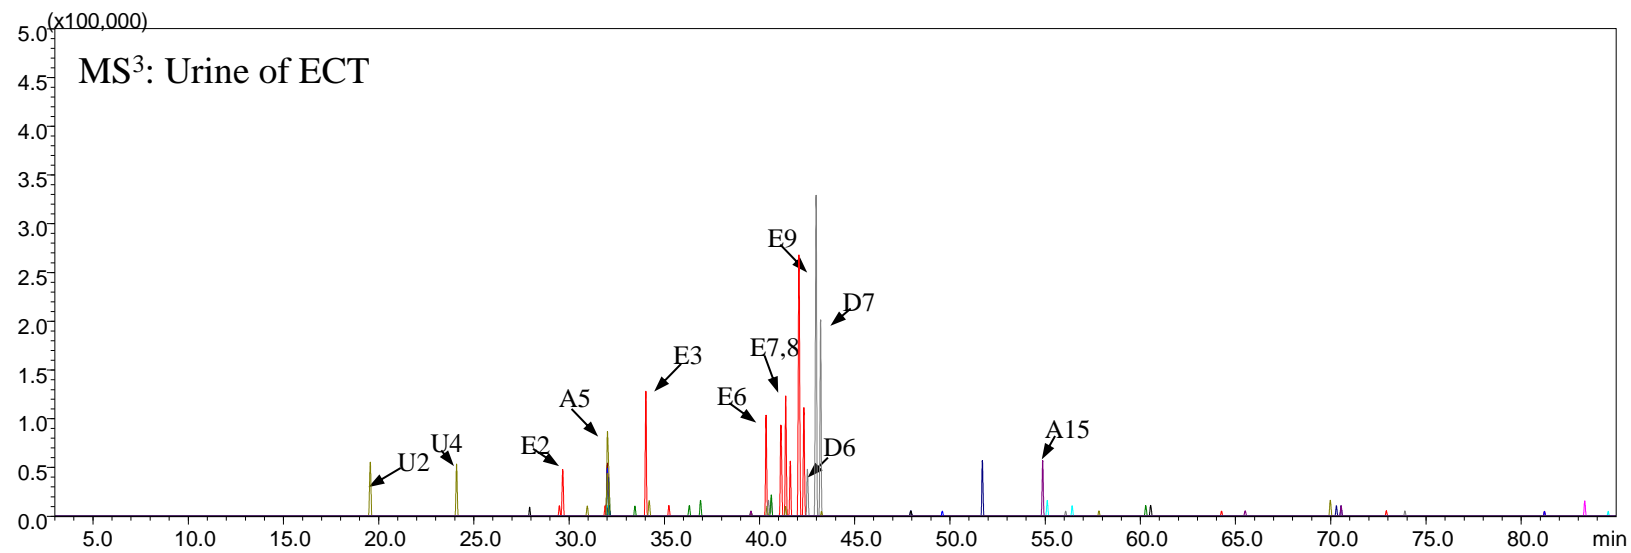

**Fig. S6 (continued)**

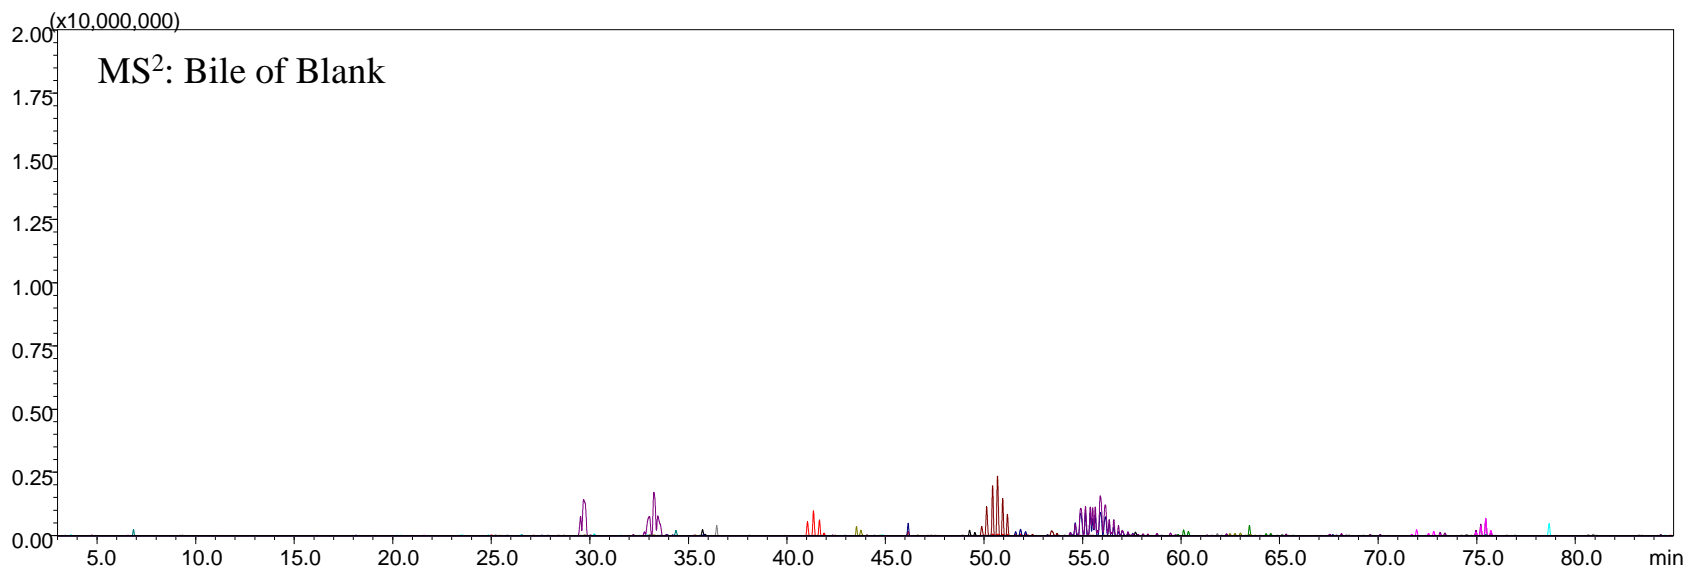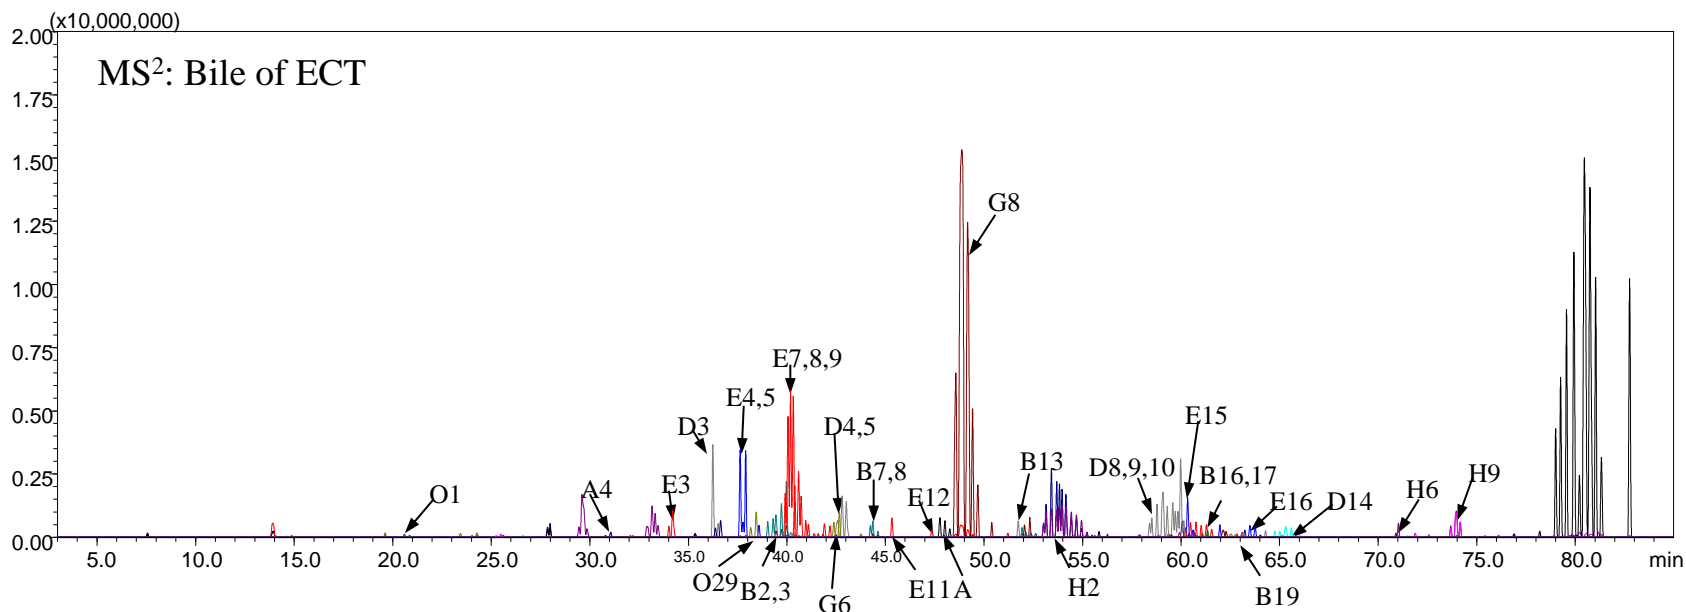

**Fig. S6 (continued)**

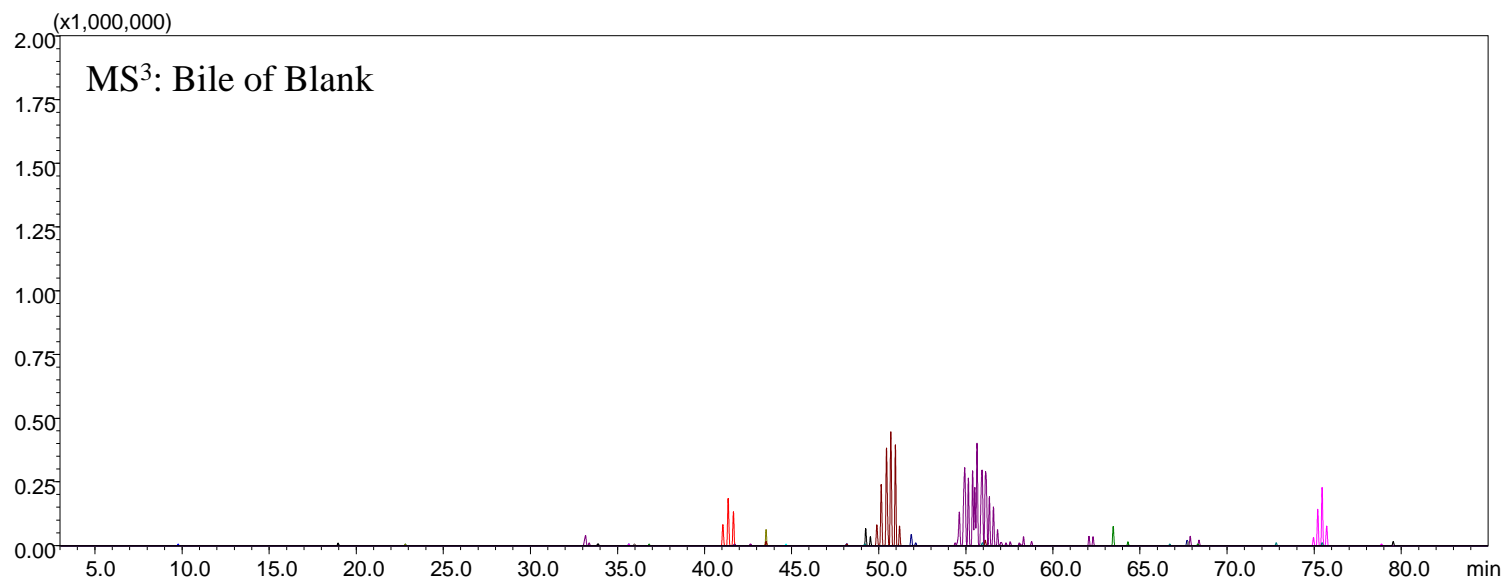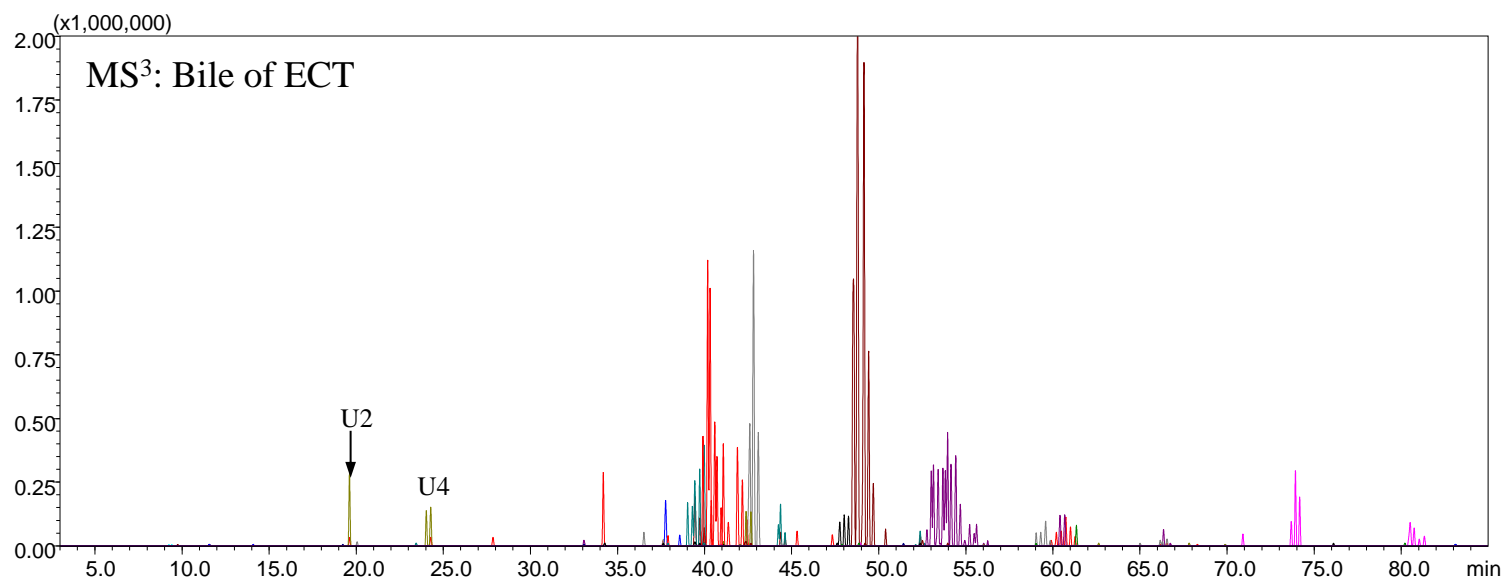

**Fig. S6** (continued)

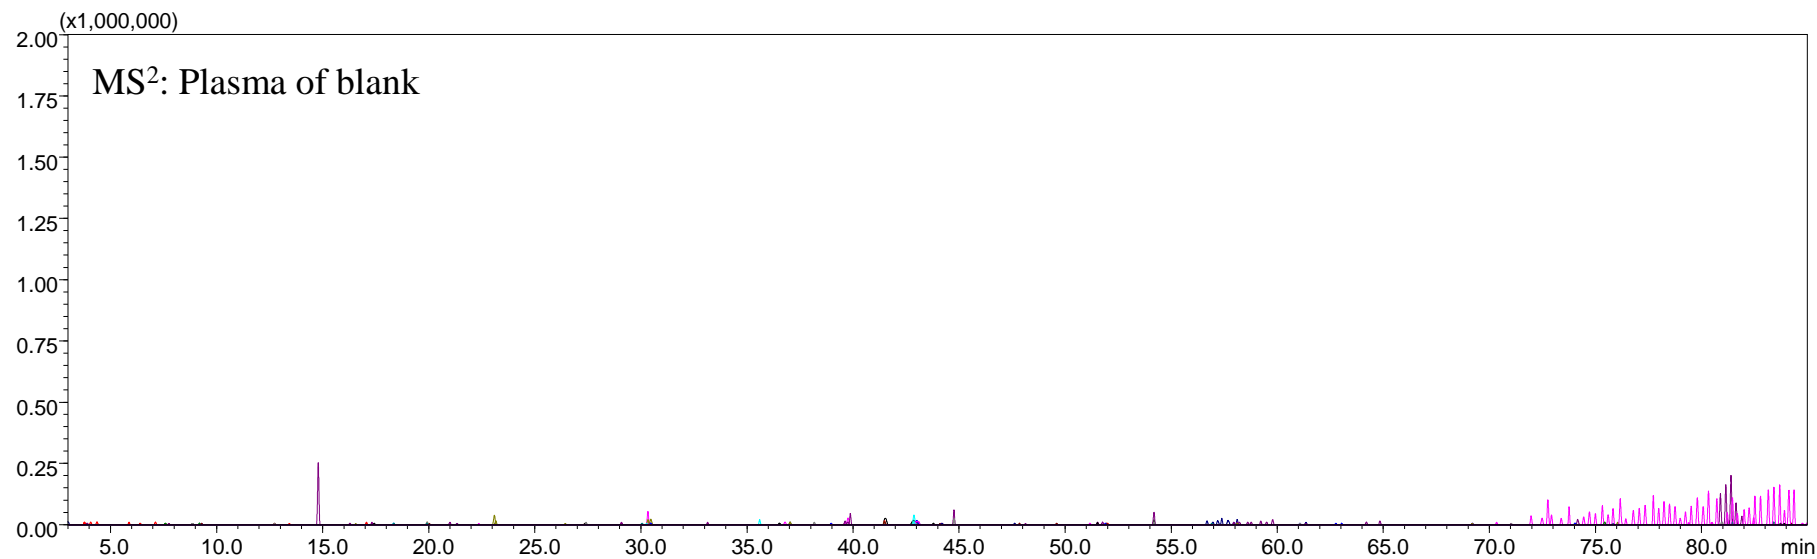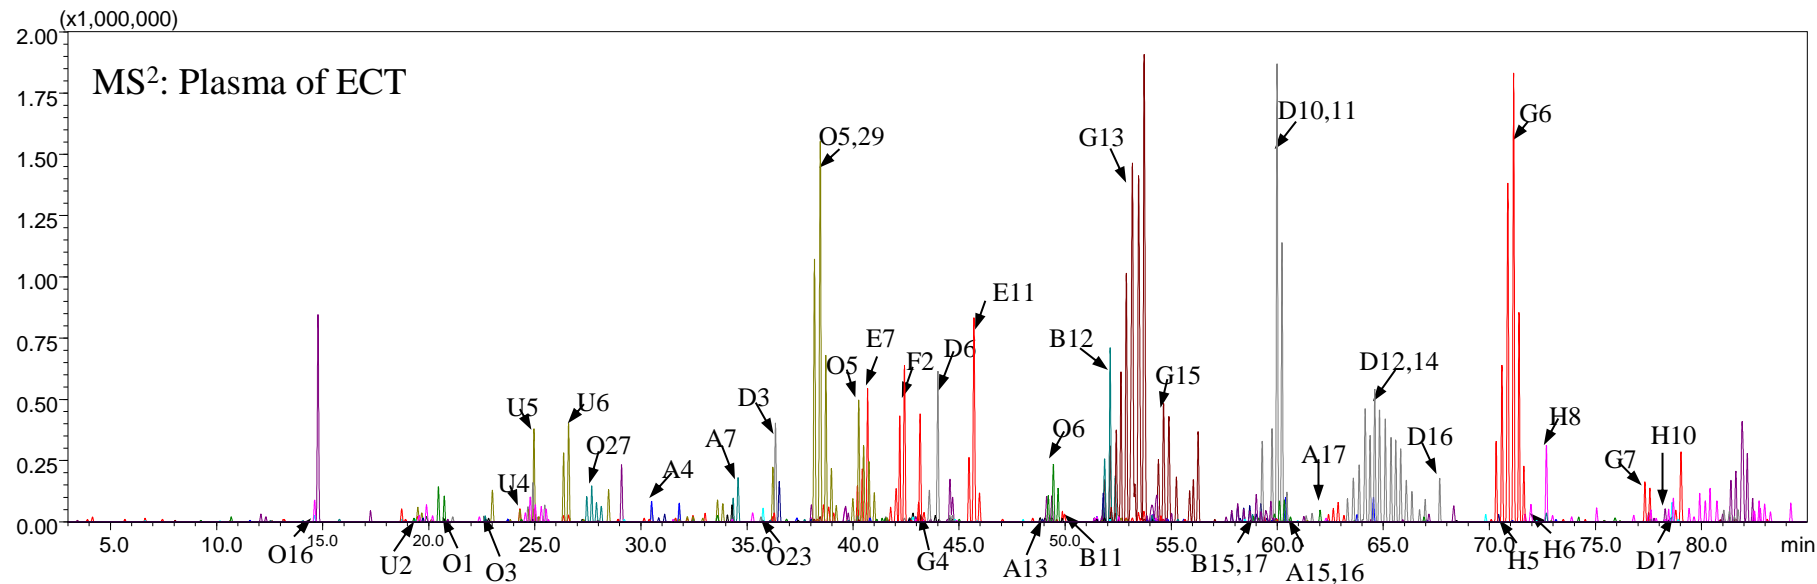

**Fig. S6 (continued)**

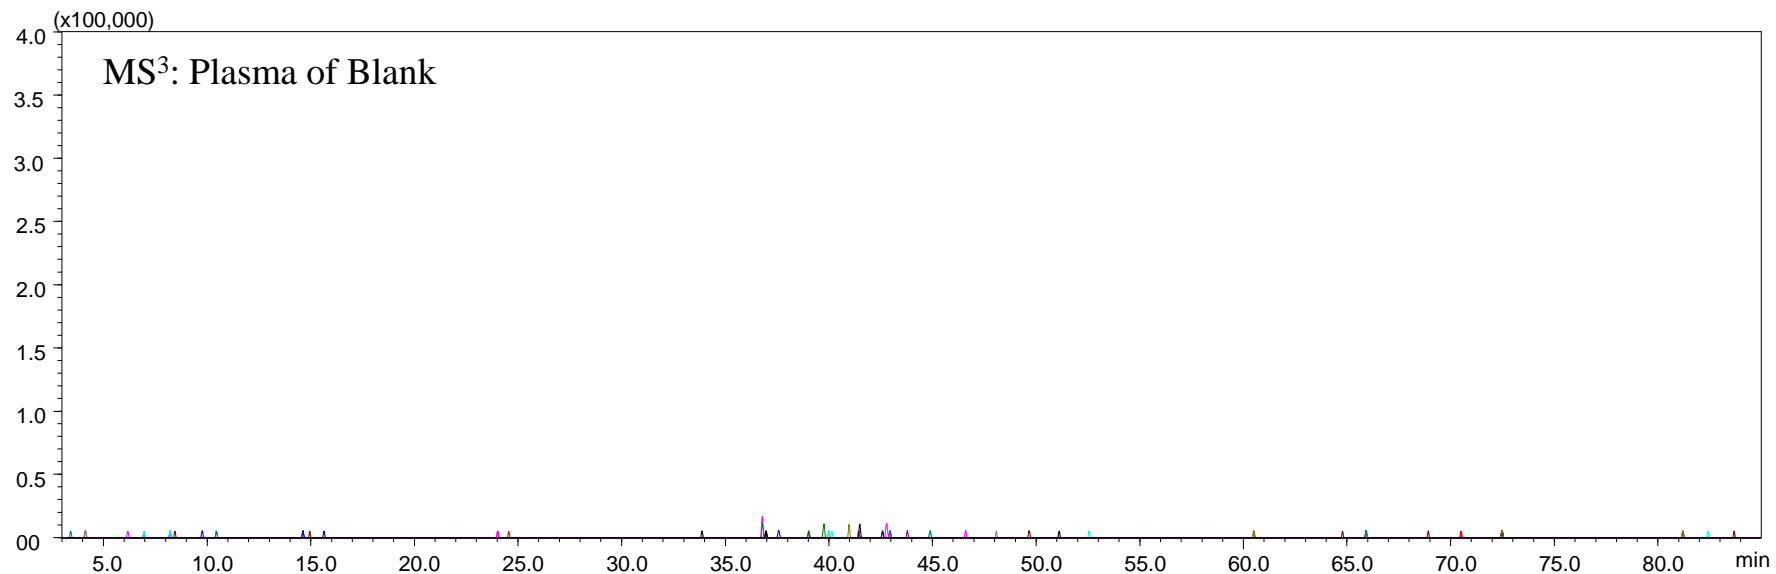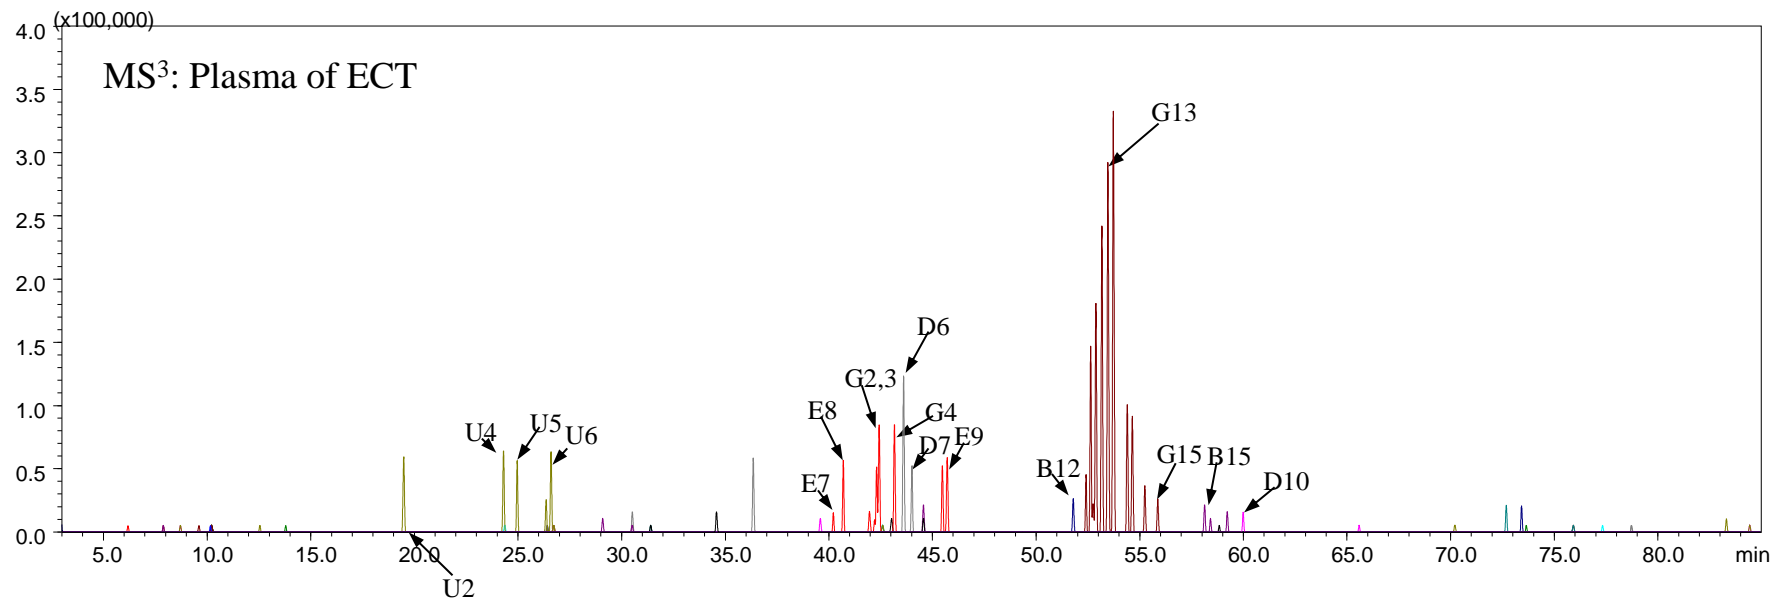

Fig. S6 (continued)
